# Supplementary material for: Site-Dependent Differences in DNA Methylation and Their Impact on Plant Establishment and Phosphorus Nutrition in Populus trichocarpa
Source: PubMed Central journal article supplement (PMC5167412; doi:10.1371/journal.pone.0168623), 2016-12-19
Supplement: pone.0168623.s012.pdf [file pone.0168623.s012.pdf]

**S4 Table. Description of differentially methylated regions (DMRs) occurring in annotated promoter and gene body sequences of the *Populus trichocarpa* genome.**

| DMR gene IDs             | annotation                                                                                                                                                                                               | higher methylation site | <sup>m</sup> C context |
|--------------------------|----------------------------------------------------------------------------------------------------------------------------------------------------------------------------------------------------------|-------------------------|------------------------|
| <i>POPTR_0001s01660g</i> | NBS-LRR resistance gene-like protein ARGH35                                                                                                                                                              | Wallstawe               | CHG & CHH              |
| <i>POPTR_0001s06110g</i> | dirigent-like protein, regulates coupling of monolignol plant phenols to generate the cell wall polymers lignins and lignans that are involved in structural fortification and defense against pathogens | Wallstawe               | CHH                    |
| <i>POPTR_0001s17820g</i> | DNA polymerase III                                                                                                                                                                                       | Wallstawe               | CHG                    |
| <i>POPTR_0001s19460g</i> | zinc knuckle – zinc ion binding, nucleic acid binding                                                                                                                                                    | Anderlingen             | CHG                    |
| <i>POPTR_0001s42010g</i> | catalytic domain of protein kinases                                                                                                                                                                      | Wallstawe               | CHH                    |
| <i>POPTR_0002s03260g</i> | horseradish peroxidase and related secretory plant peroxidases                                                                                                                                           | Anderlingen             | CHG & CHH              |
| <i>POPTR_0002s07850g</i> | component of the thylakoid-localized Sec system involved in the translocation of cytoplasmic proteins into plastid                                                                                       | Wallstawe               | CHG                    |
| <i>POPTR_0002s23200g</i> | aconitate hydratase, encodes a aconitase that can catalyze the conversion of citrate to isocitrate through a cis-aconitate intermediate, indicating a role in the response to oxidative stress           | Wallstawe               | CHG                    |
| <i>POPTR_0003s12640g</i> | glycosyl hydrolase family 32, beta-fructosidases                                                                                                                                                         | Wallstawe               | CHH                    |
| <i>POPTR_0005s01450g</i> | PPR repeat family, DYW family of nucleic acid deaminases                                                                                                                                                 | Wallstawe               | CHH                    |
| <i>POPTR_0005s08440g</i> | NAC domain protein                                                                                                                                                                                       | Wallstawe               | CHG                    |
| <i>POPTR_0005s11730g</i> | AAA+ superfamily represents an ancient group of ATPases belonging to the ASCE division of the P-loop NTPase fold                                                                                         | Anderlingen             | CHH                    |
| <i>POPTR_0006s02510g</i> | glutathione S-transferases                                                                                                                                                                               | Anderlingen             | CHH                    |

| DMR gene IDs              | annotation                                                                                                                                                               | higher methylation site | <sup>m</sup> C context |
|---------------------------|--------------------------------------------------------------------------------------------------------------------------------------------------------------------------|-------------------------|------------------------|
| <i>POPTR_0006s09150g</i>  | aldo-keto reductases, a superfamily of soluble NAD(P)(H) oxidoreductases whose chief purpose is to reduce aldehydes and ketones to primary and secondary alcohols        | Anderlingen             | CHG & CHH              |
| <i>POPTR_0006s18990g</i>  | effector domain of the CAP family of transcription factors, members include CAP (or cAMP receptor protein (CRP)), which binds cAMP, FNR (fumarate and nitrate reduction) | Anderlingen             | CHH                    |
| <i>POPTR_0006s20500g</i>  | elongation factor Tu family protein                                                                                                                                      | Wallstawe               | CHG                    |
| <i>POPTR_0006s22680g</i>  | NAD(P)-binding Rossmann-like domain                                                                                                                                      | Anderlingen             | CHG                    |
| <i>POPTR_0008s18840g</i>  | chromosome segregation protein                                                                                                                                           | Wallstawe               | CHG                    |
| <i>POPTR_0009s09810g</i>  | UDP-glucosyl transferase                                                                                                                                                 | Anderlingen             | CHG                    |
| <i>POPTR_0009s17130g</i>  | lectin L-type, legume lectins                                                                                                                                            | Wallstawe               | CpG & CHH              |
| <i>POPTR_0010s05110g</i>  | catalytic domain of protein kinases                                                                                                                                      | Anderlingen             | CHG                    |
| <i>POPTR_0010s20390g</i>  | peptidases S8 3                                                                                                                                                          | Wallstawe               | CHH                    |
| <i>POPTR_0011s15760g</i>  | S-locus glycoprotein family                                                                                                                                              | Wallstawe               | CHH                    |
| <i>POPTR_0011s15770g</i>  | galactose mutarotase-like                                                                                                                                                | Wallstawe               | CHH                    |
| <i>POPTR_0014s01810g</i>  | peroxisomal membrane 22 kDa family protein                                                                                                                               | Anderlingen             | CHG & CHH              |
| <i>POPTR_0014s18950g</i>  | glycosyltransferase like family                                                                                                                                          | Wallstawe               | CpG                    |
| <i>POPTR_0015s09330g</i>  | galactinol-sucrose galactosyltransferase                                                                                                                                 | Anderlingen             | CHH                    |
| <i>POPTR_0016s021501g</i> | glycosyltransferase family 28 C-terminal domain                                                                                                                          | Wallstawe               | CHG                    |
| <i>POPTR_0016s04630g</i>  | cysteine/histidine-rich C1 domain family protein                                                                                                                         | Anderlingen             | CHH                    |
| <i>POPTR_0017s03570g</i>  | transcription factor Tfb4, TFIIH (subunit of the general transcriptions factors for promotor recognition and initiation of transcription)                                | Anderlingen             | CHG                    |
| <i>POPTR_0017s04440g</i>  | leucine-rich repeat receptor-like protein kinase                                                                                                                         | Wallstawe               | CHG & CHH & CpG        |
| <i>POPTR_0017s06300g</i>  | AAA+ superfamily represents an ancient group of ATPases belonging to the ASCE division of the P-loop NTPase fold                                                         | Wallstawe               | CHH                    |
| <i>POPTR_0019s00260g</i>  | LRR 8, leucine rich repeat                                                                                                                                               | Anderlingen             | CHH                    |
