# Supplementary material for: Site-Dependent Differences in DNA Methylation and Their Impact on Plant Establishment and Phosphorus Nutrition in Populus trichocarpa
Source: PubMed Central journal article supplement (PMC5167412; doi:10.1371/journal.pone.0168623), 2016-12-19
Supplement: pone.0168623.s013.pdf [file pone.0168623.s013.pdf]

**S5 Table. Loci of differential DNA methylation in coding regions of clonal *Populus trichocarpa* derived from two short rotation forestry sites (Anderlingen vs. Wallstawe).**

| differentially methylated gene ID | annotation                                              | differentially methylated coding region | higher methylation level site | cytosine context |
|-----------------------------------|---------------------------------------------------------|-----------------------------------------|-------------------------------|------------------|
| <i>POPTR_0008s20220</i>           | putative histidine-containing phosphotransfer protein 2 | promoter                                | Anderlingen                   | CpG              |
| <i>POPTR_0010s11680</i>           | non-repetitive/WGA-negative nucleoporin family protein  | gene body                               | Anderlingen                   | CHH              |
| <i>POPTR_0012s04860</i>           | chaperonin family protein                               | gene body                               | Anderlingen                   | CpG              |
| <i>POPTR_0017s02120</i>           | zinc finger family protein                              | promoter                                | Anderlingen                   | CHH              |
| <i>POPTR_0017s14590</i>           | T3/T7-like RNA polymerase                               | gene body                               | Anderlingen                   | CHG & CHH        |
| <i>POPTR_0018s14780</i>           | vacuolar protein sorting-associated protein 26          | promoter                                | Anderlingen                   | CHH              |
