# Supplementary material for: Site-Dependent Differences in DNA Methylation and Their Impact on Plant Establishment and Phosphorus Nutrition in Populus trichocarpa
Source: PubMed Central journal article supplement (PMC5167412; doi:10.1371/journal.pone.0168623), 2016-12-19
Supplement: pone.0168623.s014.pdf [file pone.0168623.s014.pdf]

**S6 Table. Pearson’s product-moment correlation of methylation state in differentially methylated genes and gene expression in plant material from clonal *Populus trichocarpa* (cv. Muhle Larson) cuttings derived from two different short rotation forestry sites (Anderlingen vs. Wallstawe).**

| sites       | tissue | treatment | correlation coefficient (r) | p-value |
|-------------|--------|-----------|-----------------------------|---------|
| Anderlingen |        | +P        | -0.57                       | 0.0522  |
|             | leaves | -P        | -0.50                       | 0.3156  |
|             |        | +P        | -0.39                       | 0.2150  |
|             | roots  | -P        | -0.75                       | 0.0862  |
| +P          |        | -0.80     | 0.0018                      |         |
| Wallstawe   | leaves | -P        | -0.52                       | 0.2860  |
|             |        | +P        | -0.71                       | 0.0100  |
|             | roots  | -P        | -0.87                       | 0.0227  |
|             |        | +P        | -0.87                       | 0.0227  |
